# Supplementary material for: Continuous Expression of Interferon Regulatory Factor 4 Sustains CD8+ T Cell Immunity against Tumor
Source: PubMed Central journal article supplement (PMC10765897; doi:10.34133/research.0271), 2023-11-17
Supplement: research.0271.f1.pdf [file research.0271.f1.pdf]

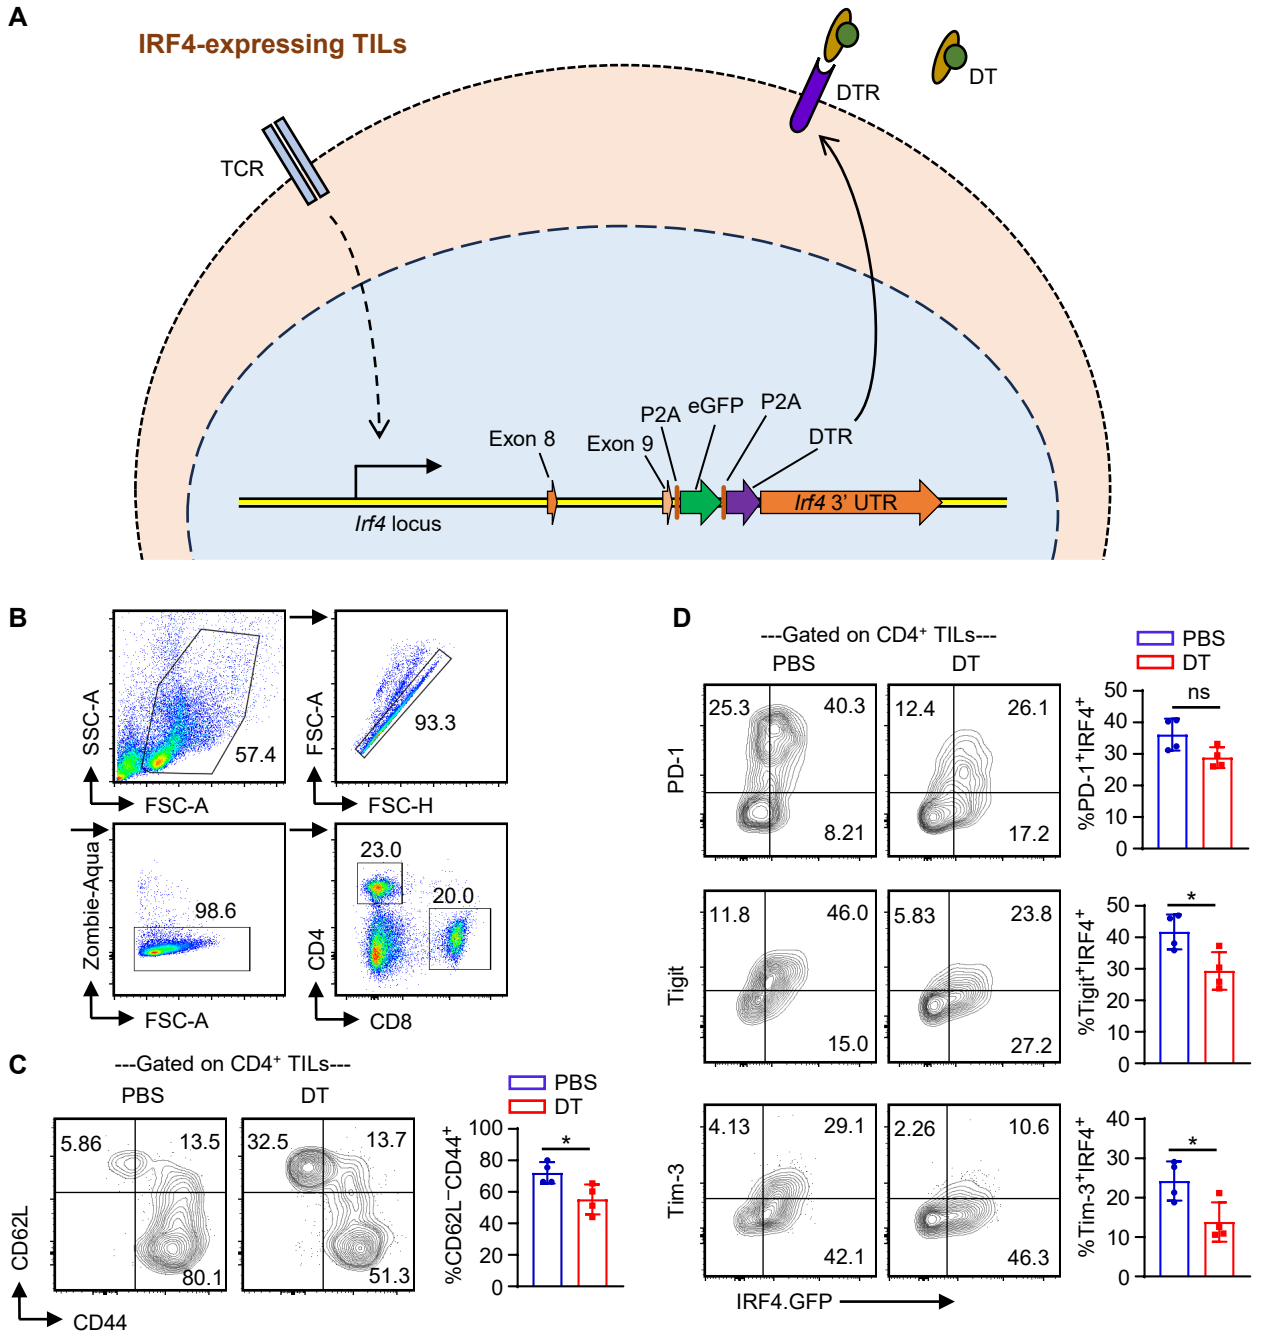

**Figure S1. Flow cytometric analysis of CD4<sup>+</sup> TILs in melanoma, related to Figure 2. (A)**

Diagram illustrating how DT treatment potentially depletes TILs expressing IRF4. For the *Irf4*<sup>GFP-DTR</sup> mice, a P2A.eGFP\_P2A.DTR\_stop cassette was inserted immediately after the last exon of WT B6 mouse *Irf4*. In TILs expressing IRF4, the endogenous *Irf4* expression is associated with DTR expression, rendering these cells susceptible to depletion upon DT administration. **(B–D)** *Irf4*<sup>GFP-DTR</sup> mice were subcutaneously injected with 0.1 × 10<sup>6</sup> B16F10 melanoma cells and received treatments of 25 μg/kg DT or PBS on days 10, 12 and 14 post tumor implantation. TILs were obtained on day 22 for flow cytometry analysis. **(B)** Gating strategies applied during the analysis. **(C)** Percentage of CD62L<sup>+</sup>CD44<sup>+</sup> T cells among CD4<sup>+</sup> TILs. **(D)** Percentages of PD-1<sup>+</sup>IRF4<sup>+</sup>, Tigit<sup>+</sup>IRF4<sup>+</sup>, and Tim-3<sup>+</sup>IRF4<sup>+</sup> cells among CD4<sup>+</sup> TILs. The data in bar graphs are presented as mean ± SD (n = 4), and statistical significance was determined using an unpaired two-tailed Student's *t* test. ns *P* > 0.05, \**P* < 0.05.

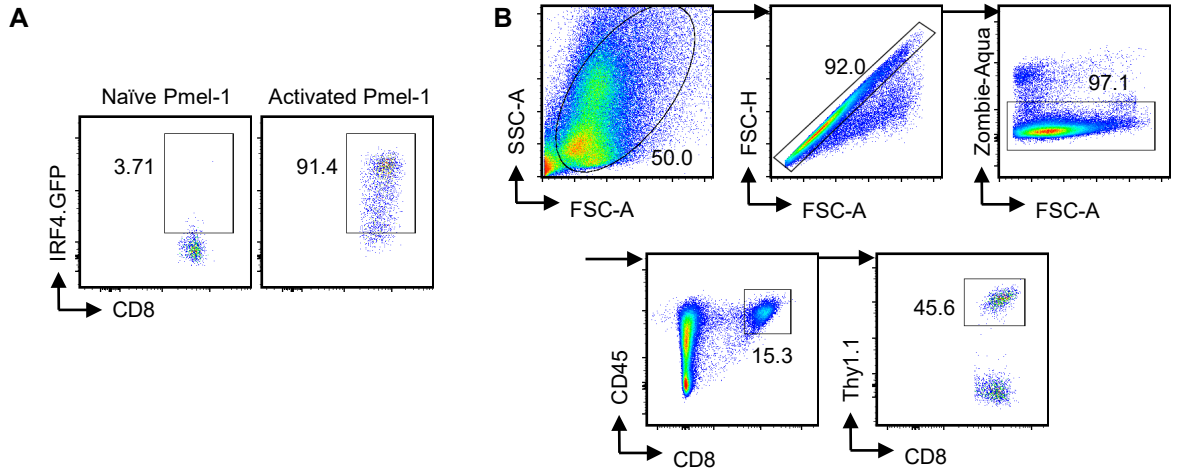

**Figure S2. Flow cytometry analysis of Pmel-1 CD8<sup>+</sup> T cells, related to Figure 3.**  
**(A)** Expression of IRF4.GFP in naïve Pmel-1 cells and *in vitro* activated Pmel-1 cells.  
**(B)** Gating strategies used to detect the adoptively transferred Pmel-1 cells in the B16F10 melanoma.

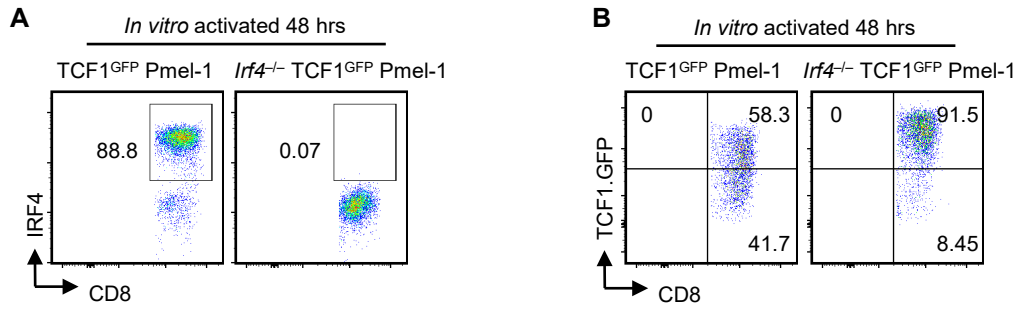

**Figure S3. *Irf4*-deficient Pmel-1 cells maintain TCF1 expression following *in vitro* activation, related to Figure 5.** Splenocytes from TCF1<sup>GFP</sup> Pmel-1 or *Irf4*<sup>-/-</sup> TCF1<sup>GFP</sup> Pmel-1 mice were *in vitro* stimulated with hgp100<sub>25-33</sub> for 48 hrs. **(A)** Representative flow cytometry plots showing the percentage of IRF4<sup>+</sup> cells among indicated Pmel-1 cell populations. **(B)** Representative flow cytometry plots showing the percentage of TCF1.GFP<sup>+</sup> cells among indicated Pmel-1 cell populations.
